# Supplementary material
Source: PubMed Central journal article supplement (PMC4159251)
Supplement: NIHMS623459-supplement-s1.pdf [file NIHMS623459-supplement-s1.pdf]

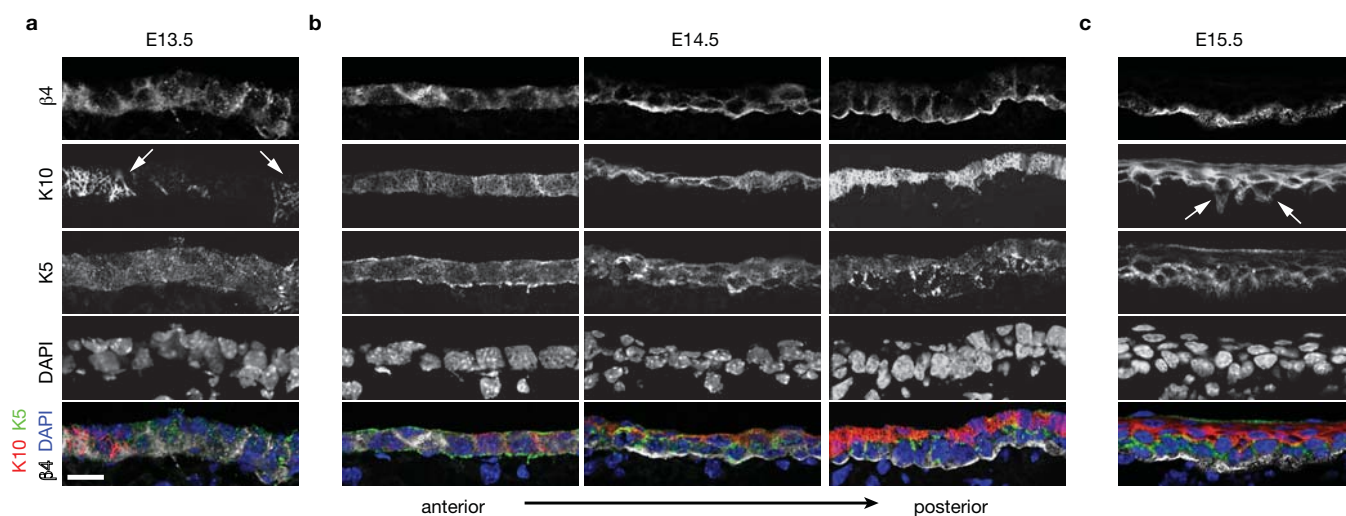

**Supplementary Figure 1** Maturation of differentiation markers in developing epidermis **(a)** Beginning around E13.5, at the stage when suprabasal cells (except the periderm) are absent, sporadic basal cells coexpress the spinous keratin, K10, along with basal keratins K5 and K14 (not shown). Note also that at this age, the basement membrane marker and hemidesmosome constituent  $\beta$ 4-integrin is broadly and diffusely expressed throughout basal cells at E13.5, while it progressively becomes more basally restricted at later ages. **(b)** Sections of wild-type E14.5 back skin from anterior (less differentiated) to posterior (more differentiated). In anterior regions of single-layered epidermis, K10 and K5 are broadly coexpressed, while  $\beta$ 4-integrin

remains diffuse. In areas where  $\beta$ 4-integrin begins to show some apical enrichment and suprabasal cells are present, K10 becomes more restricted to suprabasal cells, though the basal keratin K5 is diffusely coexpressed there. In posterior regions, the segregation of K10 and K5 becomes more apparent. **(c)** At E15.5,  $\beta$ 4-integrin becomes more restricted to the epidermal-dermal boundary, while K10 and K5 are expressed in opposing domains. An exception is the appearance of sporadic cells positioned in the basal layer which coexpress K10 and K4 (arrows). We suggest that these are cells undergoing differentiation by delamination rather than asymmetric cell division.

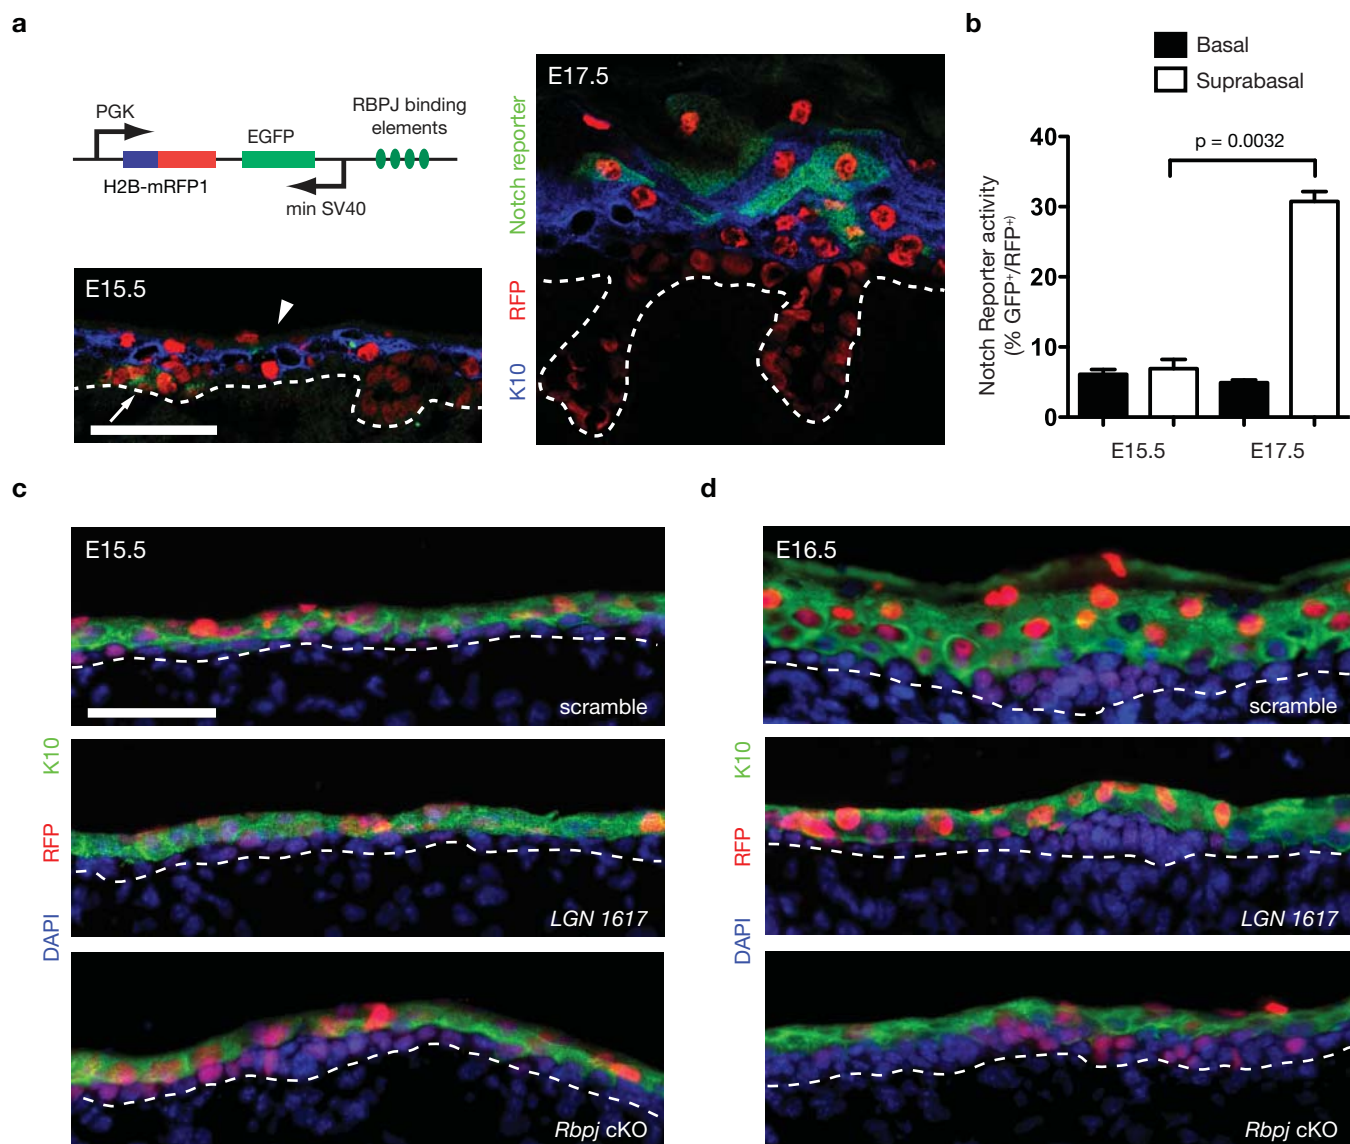

**Supplementary Figure 2** Both Notch and LGN are dispensable for early stage stratification (**a**) (Top left) Schematic of lentiviral Notch reporter construct. Nuclear H2B-RFP is expressed under a constitutive reporter to mark cells transduced with the reporter construct, while cytosolic GFP reveals cells in which Notch signaling has been activated. At E17.5 (right), robust Notch/GFP+ cells are observed in suprabasal (K10+, blue) layers. In contrast, at E15.5 (bottom left), few cells show detectable Notch activity, and those that do are weakly positive, and appear in both basal (arrow) and suprabasal (arrowhead) layers. (**b**) Quantification of the percentage of cells expressing the Notch reporter construct (RFP+) which show detectable Notch activity (GFP+).

At E17.5, there is a strong bias toward suprabasal Notch activity, while at E15.5 Notch activity is lower overall, and present equally in basal and suprabasal cells. (**c,d**) Spinous differentiation as indicated by K10 (green) at E15.5 (**c**) and E16.5 (**d**) in shScramble control (top), *LGN* knockdown (middle) and *Rbpj* knockout (bottom) sections of back skin. Note that the formation of the initial spinous layer is not impacted by impairing spindle orientation or Notch. Unlike controls, however, differentiation fails to progress in these mutants. RFP (red) indicates H2B-mRFP1 in top and middle panels, and Cre-mRFP1 in bottom panels. *Rbpj* loss at this age was confirmed by absence of the target gene *Hes1* in suprabasal layers (not shown, <sup>17</sup>). Scale bars: 50  $\mu$ m.

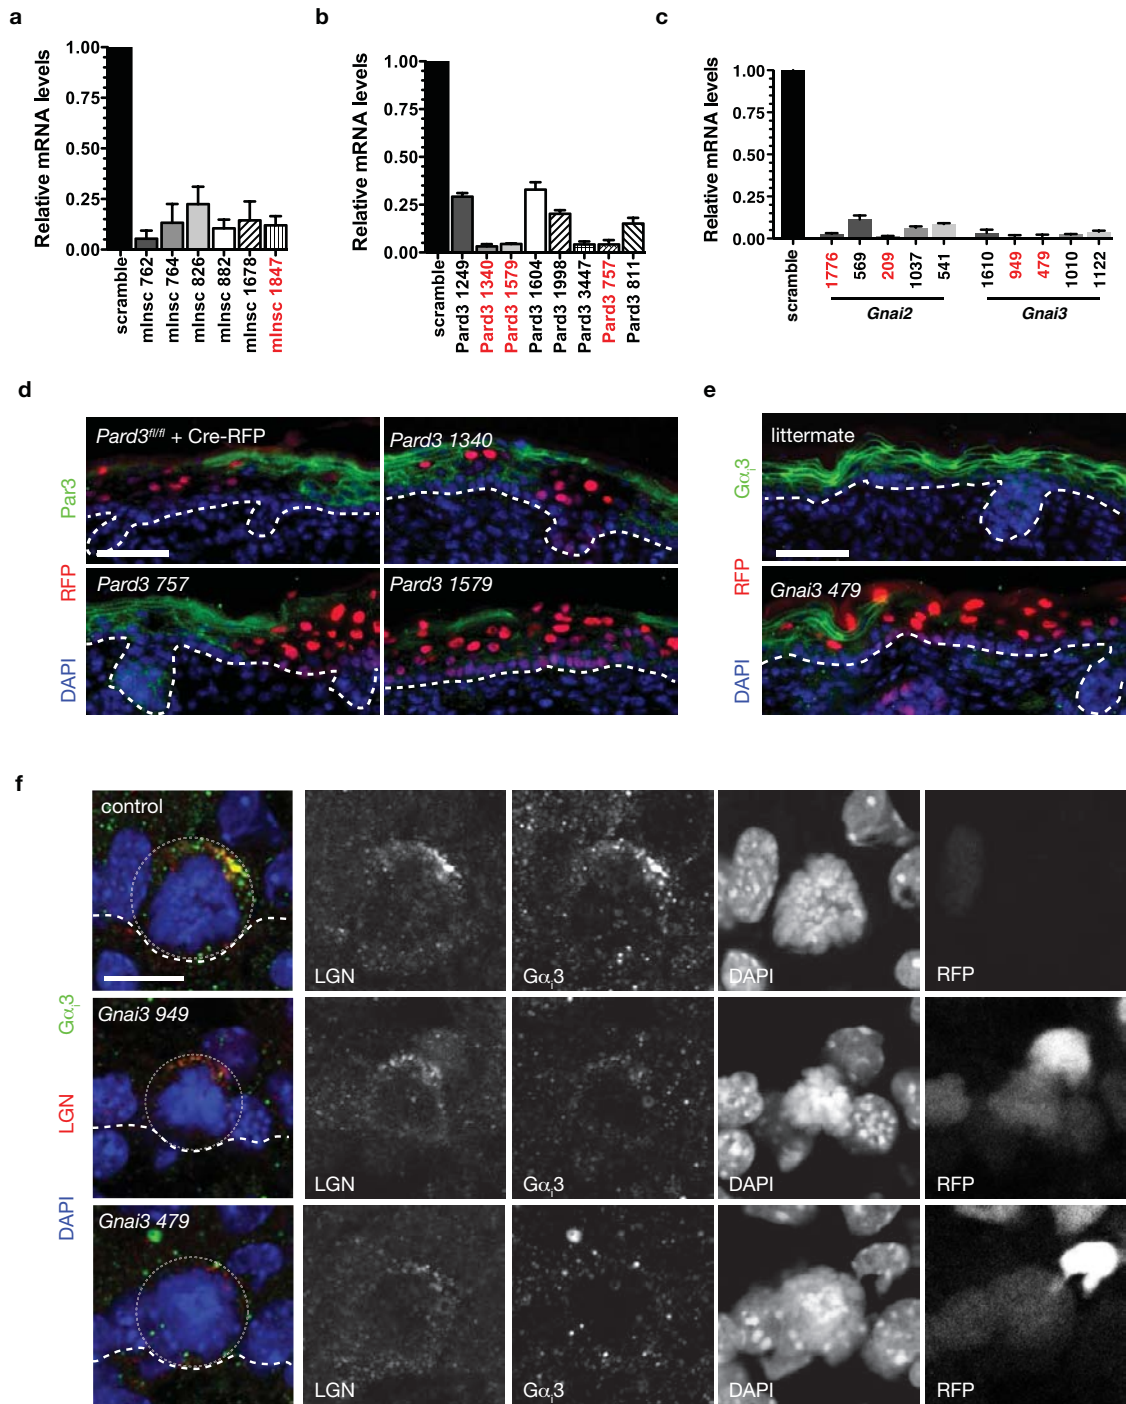

**Supplementary Figure 3** Characterization of shRNA knockdown efficiency *in vitro* and *in vivo*. (a) Quantification of *mInsc* knockdown efficiency in keratinocytes stably-transduced with retroviral mInsc, necessary due to low endogenous levels of mInsc in low calcium conditions. (b) Quantification of *Pard3* knockdown in keratinocytes. Red letters indicate those with the highest levels of knockdown (94-97%), subsequently used for *in vivo* studies. (c) Quantification of mRNA knockdown efficiency in keratinocytes for *Gnai2* (left) and *Gnai3* (right) shRNA clones. Those with the strongest knockdown (>97%) are shown in red letters, and were subsequently used *in vivo*. Bars are the mean  $\pm$  SD. (d) Back skin sections from E17.5

epidermis showing specific loss of Par3 expression in mosaic *Pard3* knockout (top left) or knockdown tissue. (e) Confirmation of knockdown efficiency by immunofluorescence in E17.5 back skin. In addition to its polarized localization in mitotic basal cells,  $G\alpha_3$  is also localized to cell membranes suprabasally, like Par3 (top panel). This localization is specifically lost in RFP<sup>+</sup> regions of mosaic knockdown tissue (bottom panel). (f)  $G\alpha_3$  is normally enriched apically in mitotic basal cells (left, see also Fig. 5b), but following *Gnai3* knockdown, LGN cortical expression is frequently reduced (middle row, weaker hairpin) or delocalized (bottom row, stronger hairpin).

Supplementary Table 1 Chi-square analyses of division angle distributions.

| Condition 1                               | Condition 2                                  | Figure | Chi square p-value | Significance |
|-------------------------------------------|----------------------------------------------|--------|--------------------|--------------|
| E12.5                                     | E13.5                                        | 1f     | 0.0176             | *            |
| E13.5                                     | E14.5                                        | 1f     | 0.6431             | n.s.         |
| E14.5                                     | E15.5                                        | 1f     | 0.1413             | n.s.         |
| E15.5                                     | E16.5                                        | 1f     | < 0.0001           | ***          |
| E16.5                                     | E17.5                                        | 1f     | 0.0938             | n.s.         |
| E15.5 scramble EYFP-mInsc                 | E15.5 YFP- internal controls <sup>§</sup>    | 3d     | 0.8169             | n.s.         |
| E15.5 scramble EYFP-mInsc                 | E15.5 littermates <sup>§</sup>               | 3d     | 0.8096             | n.s.         |
| E15.5 scramble EYFP-mInsc                 | E15.5 scramble H2B-RFP                       | 3d     | 0.0589             | n.s.         |
| E15.5 scramble H2B-RFP                    | E15.5 LGN 1617 H2B-RFP                       | 3d     | 0.5394             | n.s.         |
| E17.5 scramble EYFP-mInsc                 | E17.5 YFP- internal controls <sup>§</sup>    | 3e     | 0.0316             | *            |
| E17.5 scramble EYFP-mInsc                 | E15.5 scramble EYFP-mInsc                    | 3d, 3e | < 0.0001           | ***          |
| E17.5 scramble H2B-RFP                    | E17.5 LGN 1617 H2B-RFP                       | 3e     | < 0.0001           | ***          |
| mInsc cKO (Cre-RFP)                       | mInsc <sup>§§</sup> littermates              | 4f     | < 0.0001           | ***          |
| mInsc cKO (K14-Cre)                       | mInsc <sup>§§</sup> littermates              | 4f     | < 0.0001           | ***          |
| mInsc cKO (Cre-RFP)                       | mInsc cKO (K14-Cre)                          | 4f     | 0.7446             | n.s.         |
| mInsc 1847 H2B-YFP                        | YFP- internal controls <sup>§</sup>          | 4f     | < 0.0001           | ***          |
| mInsc 1847 H2B-YFP                        | mInsc cKO (Cre-RFP)                          | 4f     | 0.0254             | *            |
| mInsc 1847 H2B-YFP                        | mInsc cKO (K14-Cre)                          | 4f     | 0.0632             | n.s.         |
| Pard3 1340 H2B-RFP                        | Pard3 1340/1579/757 littermates <sup>‡</sup> | 5d     | < 0.0001           | ***          |
| Pard3 1340 H2B-RFP                        | Pard3 1340 littermates <sup>‡,§</sup>        | 5d     | < 0.0001           | ***          |
| Pard3 1579 H2B-RFP                        | Pard3 1340/1579/757 littermates <sup>‡</sup> | 5d     | < 0.0001           | ***          |
| Pard3 1579 H2B-RFP                        | Pard3 1579 littermates <sup>‡,§</sup>        | 5d     | < 0.0001           | ***          |
| Pard3 757 H2B-RFP                         | Pard3 1340/1579/757 littermates <sup>‡</sup> | 5d     | < 0.0001           | ***          |
| Pard3 757 H2B-RFP                         | Pard3 757 littermates <sup>‡,§</sup>         | 5d     | < 0.0001           | ***          |
| Pard3 1340 H2B-RFP                        | Pard3 1579 H2B-RFP                           | 5d     | 0.0855             | n.s.         |
| Pard3 1340 H2B-RFP                        | Pard3 757 H2B-RFP                            | 5d     | 0.1065             | n.s.         |
| Pard3 757 H2B-RFP                         | Pard3 1579 H2B-RFP                           | 5d     | 0.9071             | n.s.         |
| Pard3cKO (Cre-RFP)                        | Pard3 <sup>§§</sup> littermates <sup>‡</sup> | 5d     | 0.0024             | **           |
| Pard3cKO (Cre-RFP)                        | Pard3 1340 H2B-RFP                           | 5d     | 0.0028             | **           |
| Pard3cKO (Cre-RFP)                        | Pard3 1579 H2B-RFP                           | 5d     | 0.2557             | n.s.         |
| Pard3cKO (Cre-RFP)                        | Pard3 757 H2B-RFP                            | 5d     | 0.3046             | n.s.         |
| Pard3b 2571 H2B-YFP                       | Pard3b 2571 littermates <sup>‡</sup>         | 5e     | 0.5244             | n.s.         |
| Pard3 <sup>§§</sup> + Pard3b 2571 Cre-RFP | Pard3 <sup>§§</sup> +Cre-RFP (cKO)           | 5e     | 0.8017             | n.s.         |
| Pard3 1340 EYFP-mInsc                     | YFP- internal controls                       | 5h     | < 0.0001           | ***          |
| Pard3 1340 EYFP-mInsc                     | Pard3 1340 H2B-RFP                           | 5d, 5h | 0.7474             | n.s.         |
| scramble EYFP-mInsc                       | Pard3 1340 EYFP-mInsc                        | 3e, 5h | < 0.0001           | ***          |
| Gnai2 1776 H2B-YFP                        | Gnai2 209/1776 littermates <sup>‡</sup>      | 6c     | 0.9709             | n.s.         |
| Gnai2 209 H2B-YFP                         | Gnai2 209/1776 littermates <sup>‡</sup>      | 6c     | 0.3643             | n.s.         |
| Gnai2 1776 H2B-YFP                        | scramble                                     | 6c, 3e | 0.8641             | n.s.         |
| Gnai2 209 H2B-YFP                         | scramble                                     | 6c, 3e | 0.6512             | n.s.         |
| Gnai3 479 H2B-RFP                         | RFP- internal controls                       | 6d     | < 0.0001           | ***          |
| Gnai3 479 H2B-RFP                         | Gnai3 479/949 littermates <sup>‡</sup>       | 6d     | < 0.0001           | ***          |
| Gnai3 479 H2B-RFP                         | scramble                                     | 6d, 3e | < 0.0001           | ***          |
| Gnai3 479 H2B-RFP                         | Gnai3 949 H2B-RFP                            | 6d     | 0.5653             | n.s.         |
| Gnai3 949 H2B-RFP                         | Gnai3 479/949 littermates <sup>‡</sup>       | 6d     | < 0.0001           | ***          |
| Gnai3 949 H2B-RFP                         | scramble                                     | 6d, 3e | < 0.0001           | ***          |
| LGN 1617 RFP-LGNAC                        | LGN 1617 H2B-RFP                             | 6e, 3e | 0.1554             | n.s.         |
| LGN 1617 RFP-LGNAC                        | Gnai3 479 H2B-RFP                            | 6e, 6d | 0.9901             | n.s.         |
| mInsc cKO (Cre-RFP)                       | mInsc <sup>§§</sup> littermates              | 7e     | < 0.0001           | ***          |
| Gnai3 479 H2B-RFP                         | Gnai3 479 littermates                        | 7e     | < 0.0001           | ***          |
| Gnai3 479 H2B-RFP                         | mInsc cKO (Cre-RFP)                          | 7e     | 0.1394             | n.s.         |
| Gnai3 479 H2B-RFP                         | LGN 1617 H2B-RFP                             | 7e     | < 0.0001           | ***          |
| mInsc cKO (Cre-RFP)                       | LGN 1617 H2B-RFP                             | 7e     | < 0.0001           | ***          |
| mInsc <sup>§§</sup> + Gnai3 479 Cre-RFP   | Gnai3 479 H2B-RFP                            | 7e     | 0.0003             | ***          |
| mInsc <sup>§§</sup> + Gnai3 479 Cre-RFP   | mInsc cKO (Cre-RFP)                          | 7e     | < 0.0001           | ***          |
| mInsc <sup>§§</sup> + Gnai3 479 Cre-RFP   | LGN 1617 H2B-RFP                             | 7e     | 0.1179             | n.s.         |
| mInsc <sup>§§</sup> + Gnai3 479 Cre-RFP+  | mInsc <sup>§§</sup> + Gnai3 479 Cre-RFP-     | 7e     | < 0.0001           | ***          |
| mInsc <sup>§§</sup> + Gnai3 479 Cre-RFP   | mInsc <sup>§§</sup> littermates              | 7e     | 0.828              | n.s.         |
| mInsc <sup>§§</sup> + Gnai3 479 Cre-RFP   | mInsc 1847 + Gnai3 479 (RFP+ YFP+)           | 7e, 7f | 0.2147             | n.s.         |
| wild-type (YFP- RFP-)                     | Gnai3 479 (RFP+)                             | 7f     | 0.0008             | ***          |
| wild-type (YFP- RFP-)                     | mInsc 1847 (YFP+)                            | 7f     | 0.0008             | ***          |
| wild-type (YFP- RFP-)                     | mInsc 1847 + Gnai3 479 (RFP+ YFP+)           | 7f     | 0.0017             | **           |
| mInsc 1847 (YFP+)                         | Gnai3 479 (RFP+)                             | 7f     | 0.4903             | n.s.         |
| mInsc 1847 (YFP+)                         | mInsc 1847 + Gnai3 479 (RFP+ YFP+)           | 7f     | 0.1319             | n.s.         |
| Gnai3 479 (RFP+)                          | mInsc 1847 + Gnai3 479 (RFP+ YFP+)           | 7f     | 0.0081             | **           |

Chi-square test values were calculated using two degrees of freedom.

Data were categorized as follows: perpendicular (70-90°); planar (0-20°); oblique (20°-70°).

As opposed to equal 30° bins, these weighted bins were chosen based on the observation that in a wild-type "bimodal" division distribution, 80-90% of all divisions fell into the perpendicular and parallel categories. Thus a 20°-70° "oblique" bin better represents a deviation from normal than a 30°-60° bin would. All data were categorized in the same way.

<sup>‡</sup> Indicates that littermates were pooled from multiple hairpins for the same gene (e.g. *Pard3 1340* littermates and *Pard3 1579* littermates), which is the actual data shown in the main text figure. This was done to avoid reproducing multiple control graphs in the main text. No statistical differences were ever found between age-matched littermates.

<sup>§</sup> Denotes a specific cohort of littermates associated with a single hairpin, in cases where the "littermates" data shown is pooled as above.

<sup>§§</sup> Indicates a data set which is not shown graphically in the main text figure panel.

**Supplementary Table 2 | Clone distribution of lentiviral lineage tracing**

|                       | E15.5 |       | E16.5 |       | p-value    |
|-----------------------|-------|-------|-------|-------|------------|
|                       | n     | %     | n     | %     |            |
| Mitotic clones        | 43    | 36.1% | 32    | 57.1% | p = 0.0137 |
| Delamination clones   | 76    | 63.9% | 24    | 42.9% |            |
| ACD clones            | 18    | 41.9% | 20    | 62.5% | p = 0.1032 |
| SCD clones            | 25    | 58.1% | 12    | 37.5% |            |
| 3 cell ACD/SCD clones | 6     | 5.0%  | 4     | 7.1%  |            |

p-values determined by two-tailed Chi-square test

Supplementary Table 3 | Effect of Par3 loss on mInsc apical localization

|                       | YFP <sup>-</sup> internal controls (n=50) |       | scramble EYFP-mInsc (n=44) |       |                      | <i>Pard3</i> <sup>1340</sup> EYFP-mInsc (n=36) |       |                      |
|-----------------------|-------------------------------------------|-------|----------------------------|-------|----------------------|------------------------------------------------|-------|----------------------|
|                       | n                                         | %     | n                          | %     | p-value <sup>†</sup> | n                                              | %     | p-value <sup>‡</sup> |
| Polarized LGN         | 38                                        | 76.0% | 41                         | 93.2% | 0.0266               | 23                                             | 63.9% | 0.0016               |
| Polarized EYFP-mInsc  |                                           |       | 40                         | 90.1% |                      | 15                                             | 41.7% | < 0.0001             |
| Colocalized LGN/mInsc |                                           |       | 39                         | 88.6% |                      | 10                                             | 27.8% | < 0.0001             |

p-values determined by Chi-square: <sup>†</sup>relative to YFP<sup>-</sup> control; <sup>‡</sup>relative to scramble EYFP-mInsc

n = number of mitotic pHH3<sup>+</sup> mitotic basal cells examined per condition from ≤ 4 biological replicates
